# Supplementary material
Source: publisher figshare collection journal article supplement (https://tandf.figshare.com/ndownloader/files/12973907)
Supplement: Supplementary file 1 [file 12973907]

**Supporting Information for Review and Online Publication**

authors, anonymous (2017): Minnesota Questionnaire. figshare. **<https://doi.org/10.6084/m9.figshare.5270980.v1>** Retrieved: 19:17, Aug 03, 2017 (GMT)

authors, anonymous (2017): North Dakota Questionnaire. figshare. [**https://doi.org/10.6084/m9.figshare.5270944.v1**](https://doi.org/10.6084/m9.figshare.5270944.v1) Retrieved: 19:18, Aug 03, 2017 (GMT)

authors, anonymous (2017): South Dakota Questionnaire. figshare. [**https://doi.org/10.6084/m9.figshare.5270977.v1**](https://doi.org/10.6084/m9.figshare.5270977.v1) Retrieved: 19:18, Aug 03, 2017 (GMT)
